# Supplementary material
Source: PubMed Central journal article supplement (PMC2630097)
Supplement: 0808133106_0808133106SI.pdf [file 0808133106_0808133106SI.pdf]

# Supporting Information

Hook-Barnard and Hinton 10.1073/pnas.0808133106

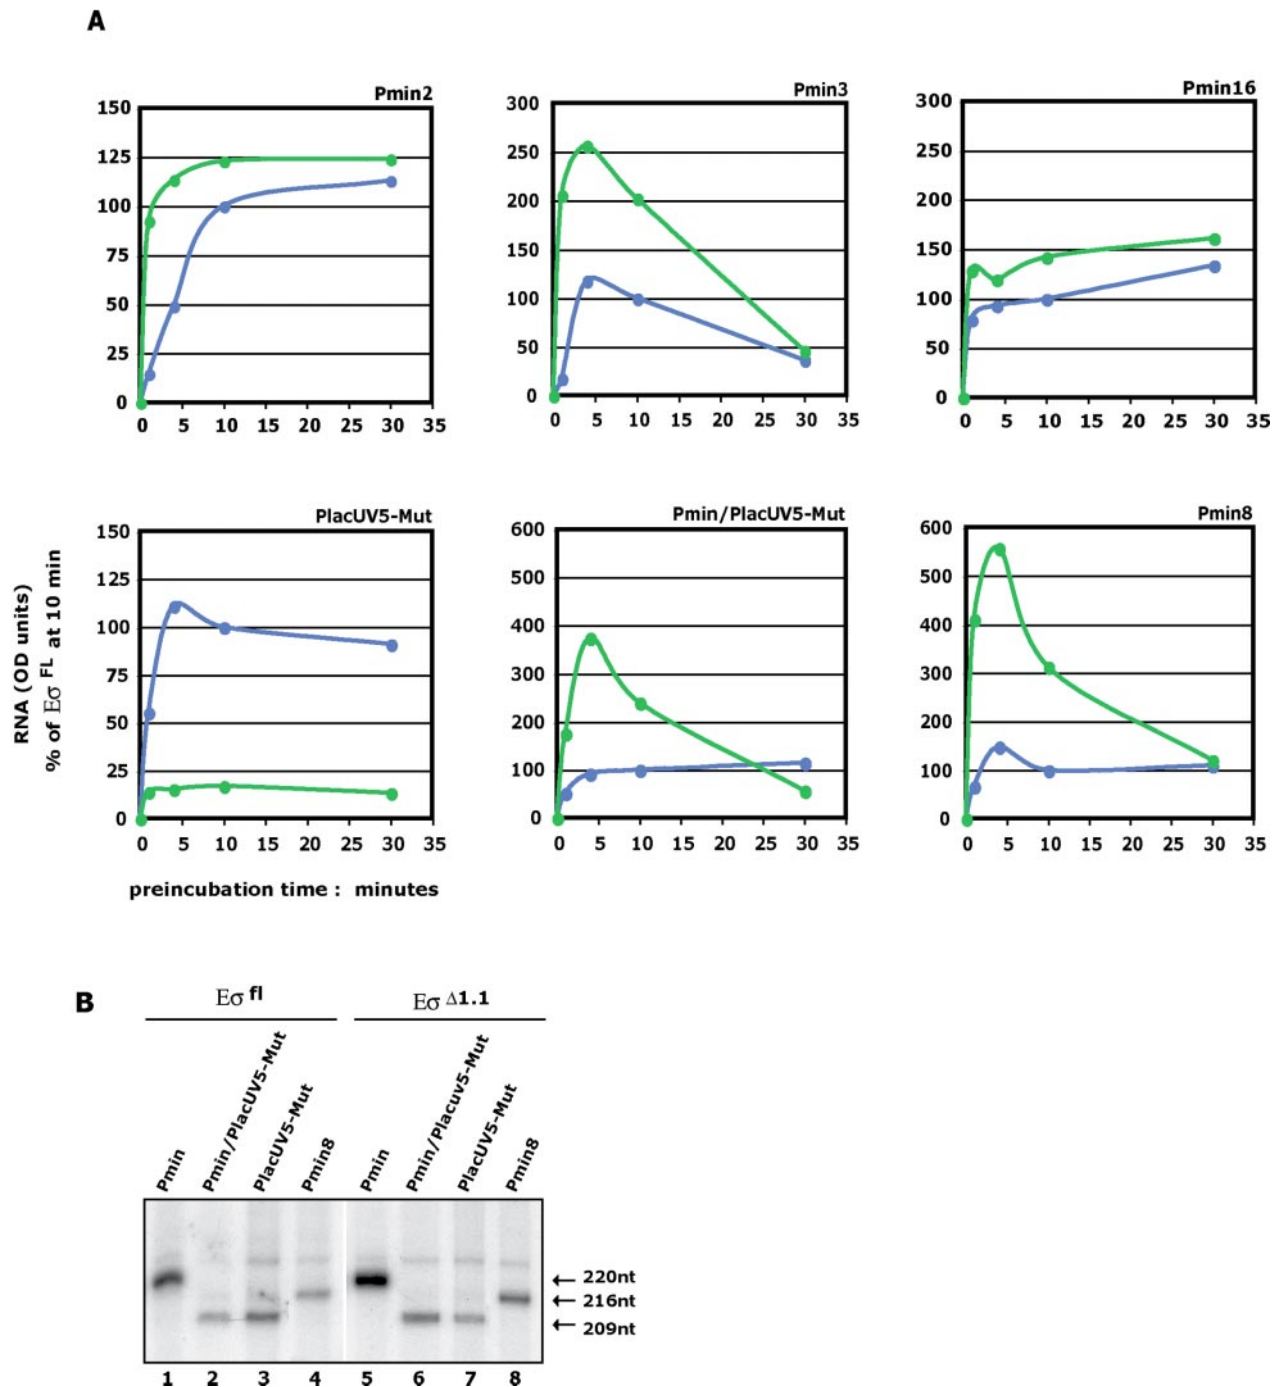

**Fig. S1.** Region 1.1 inhibition of  $P_{min}$  is not determined by the promoter recognition elements, sequences downstream of the  $-10$  element, or a short polymerase/promoter half-life. (A) Plots showing the relative amount of RNA versus the length of incubation of polymerase [ $E\sigma^{fl}$  (blue) or  $E\sigma^{\Delta 1.1}$  (green)] with the DNA (in min) before the addition of rNTPs and heparin. The amount of RNA obtained with  $E\sigma^{fl}$  at 10 min is set to 100. Note that scales vary, depending on the activity of promoter with  $E\sigma^{fl}$ . (B) Denaturing acrylamide gel showing the products of single-round transcription reactions using  $E\sigma^{fl}$  (lanes 1–4) or  $E\sigma^{\Delta 1.1}$  (lanes 5–8) and the indicated promoters. Reactions were incubated for 10 min before the addition of rNTPs and heparin. The  $P_{min8}$  mutation eliminates the stutter start seen with  $P_{min}$ . Thus,  $P_{min8}$  RNA migrates slightly faster than RNA from  $P_{min}$ . The  $P_{lacUV5-Mut}$  template yields an even shorter transcript of 209 nt.

|                                   |                      | -35    | spacer          | -10        | +1       |
|-----------------------------------|----------------------|--------|-----------------|------------|----------|
| Prefers<br>$E\sigma^{fl}$         | $\lambda P_R$        | TTGACT | ATTTTACCTCTGGC  | GGTGATAAT  | GGTTGCA  |
|                                   | $P_{lacUV5-Mut}$     | TTTACA | CTTTATGCTTCCGGC | TCGCATAAT  | GTGTCTGA |
|                                   | $P_{tac}$            | TTGACA | ATTAATCATCGGC   | TCGTATAAT  | GTGTGGA  |
|                                   | $P_{RNAI}$           | TTGAAG | TGGTGGCCTAACTAC | GGCTACACT  | AGAAGGA  |
| No Preference                     | $P_{uvsX}^{-\sigma}$ | TTGACA | TAATAATCCATAT   | GGTTATAAT  | AGAAATA  |
|                                   | $P_{uvsX}$           | TTTGCT | TAATAATCCATAT   | GGTTATAAT  | AGAAATA  |
| Prefers<br>$E\sigma^{\Delta 1.1}$ | $P_{min}$            | TTGAAA | AGATTAAAGAAATA  | TGGGAAAAC  | TCTGGAA  |
|                                   | $P_{min2}$           | TTGACA | AGATTAAAGAAATA  | TGGGAAAAC  | TCTGGAA  |
|                                   | $P_{min3}$           | TTGAAA | AGATTAAAGAAATA  | TAATAAAAAC | TCTGGAA  |
|                                   | $P_{min7}$           | TTGAAA | AGATTAAAGAAATA  | TGATATAAT  | TCTGGAA  |
|                                   | $P_{min8}$           | TTGAAA | AGATTAAAGAAATA  | TGGGAAAAC  | TCTGGACA |
|                                   | $P_{min11}$          | TTGAAA | AGATTAAAGAAATA  | TGGGAAAAC  | TGTGGAA  |
|                                   | $P_{min16}$          | TTGACA | AGATTAAAGAAATA  | TAATATAAT  | TCTGGAA  |

Fig. S2. Sequences of promoters and their preference for  $E\sigma^{fl}$  or  $E\sigma^{\Delta 1.1}$ . The  $\sigma^{70}$ -dependent -35 elements, TGN, -10 elements, and transcription start sites (+1) are shaded in gray. The spacer region, with A or T bases shown in blue, is indicated. Sigma preference as determined in this work and refs. 1 and 2 is indicated.

1. Vuthoori S, Bowers CW, McCracken A, Dombroski AJ, Hinton DM (2001) Domain 1.1 of the sigma(70) subunit of *Escherichia coli* RNA polymerase modulates the formation of stable polymerase/promoter complexes. *J Mol Biol* 309:561-572.
2. Wilson C, Dombroski AJ (1997) Region 1 of sigma70 is required for efficient isomerization and initiation of transcription by *Escherichia coli* RNA polymerase. *J Mol Biol* 267:60-74.
